# Supplementary material for: Perineural Invasion Reprograms the Immune Microenvironment through Cholinergic Signaling in Pancreatic Ductal Adenocarcinoma
Source: Oxford University Press journal article supplement (doi:10.1158/0008-5472.can-19-2689), 2020-02-25
Supplement: 00085472can192689-sup-228115_2_supp_6091936_q5ng4p.docx [file 00085472can192689-sup-228115_2_supp_6091936_q5ng4p.docx]

**Supplementary Table 1.** Correlation between CD8+ T cell density and clinicopathologic features in PDAC patients

|  |  | **CD8+ T cell Density** | |  |
| --- | --- | --- | --- | --- |
| **Clinicopathological** | **Total** | **High** | **Low** | ***P* value** |
| **feature** | **311** | **(n=155)** | **(n=156)** | **(2 test)** |
| **Age(years)** |  |  |  | .952 |
| ≤65 | 145 | 72 | 73 |  |
| >65 | 166 | 83 | 83 |  |
| **Gender** |  |  |  | .227 |
| Male | 176 | 93 | 83 |  |
| Female | 135 | 62 | 73 |  |
| **Tumor location** |  |  |  | .079 |
| Head | 206 | 110 | 96 |  |
| Body/tail | 105 | 45 | 60 |  |
| **Size** |  |  |  | .452 |
| ≤3cm | 112 | 59 | 53 |  |
| >3cm | 199 | 96 | 103 |  |
| **Tumor differentiation** |  |  |  | .267 |
| Well/moderate | 194 | 104 | 90 |  |
| Poor | 117 | 51 | 66 |  |
| **T classification** |  |  |  | **.003** |
| T1+ T2 | 39 | 28 | 11 |  |
| T3+ T4 | 272 | 127 | 145 |  |
| **N classification** |  |  |  | .509 |
| Absent | 195 | 100 | 95 |  |
| Present | 116 | 55 | 61 |  |
| **TNM stage(AJCC)** |  |  |  | .106 |
| Stage Ⅰ+Ⅱ | 243 | 127 | 116 |  |
| Stage Ⅲ+Ⅳ | 68 | 28 | 40 |  |
| **Liver metastasis** |  |  |  | .057 |
| Absent | 281 | 145 | 136 |  |
| Present | 30 | 10 | 20 |  |
| **Vascular invasion** |  |  |  | .583 |
| Absent | 280 | 141 | 139 |  |
| Present | 31 | 14 | 17 |  |
| **Perineural invasion** |  |  |  | **.014** |
| Absent | 165 | 93 | 72 |  |
| Present | 146 | 62 | 84 |  |

P values were calculated in SPSS16.0 using the Fisher’s Exact Test. *P* values < 0.05 were

considered to indicate statistical significance.
