# Supplementary material for: Perineural Invasion Reprograms the Immune Microenvironment through Cholinergic Signaling in Pancreatic Ductal Adenocarcinoma
Source: Oxford University Press journal article supplement (doi:10.1158/0008-5472.can-19-2689), 2020-02-25
Supplement: 00085472can192689-sup-228115_2_supp_6091937_q5ng4p.docx [file 00085472can192689-sup-228115_2_supp_6091937_q5ng4p.docx]

**Supplementary Table 2.** Differentially expressed genes in PDAC tissue according to the PNI status

| Gene Identifier | Fold Change of withoutPNI VS PNI | Parametric p-value |
| --- | --- | --- |
| ITIH5 | -2.085 | 0.0127763 |
| FGF19 | -1.981 | 0.006356 |
| BMP3 | -1.916 | 0.0160887 |
| NANOS1 | -1.757 | 0.0049666 |
| XLOC_l2_011361 | -1.702 | 0.0351691 |
| LOC100506299 | -1.663 | 0.0004439 |
| XLOC_l2_007424 | -1.656 | 0.0167056 |
| CFL2 | -1.635 | 0.0174444 |
| SORBS1 | -1.624 | 0.0185263 |
| MAMDC2 | -1.59 | 0.0209324 |
| AGT | -1.589 | 0.0450326 |
| C9orf95 | -1.574 | 0.0291989 |
| PCDHA9 | -1.574 | 0.0408701 |
| TMEM100 | -1.566 | 0.0153376 |
| EPHA4 | -1.565 | 0.0179833 |
| EIF2A | -1.562 | 0.0253522 |
| MEST | -1.559 | 0.0077942 |
| MPRIP | -1.547 | 1.82E-05 |
| MAPK10 | -1.544 | 0.0228622 |
| MASP1 | -1.543 | 0.0142561 |
| AKAP12 | -1.542 | 0.0234858 |
| NR2F1 | -1.535 | 0.0224767 |
| MAOB | -1.53 | 0.0387363 |
| BAAT | -1.526 | 0.0125428 |
| PTPN21 | -1.52 | 0.0090789 |
| ZC3HAV1 | -1.512 | 0.0152771 |
| MAP1B | -1.511 | 0.0147555 |
| APBA1 | -1.506 | 0.023238 |
| CNTNAP3B | -1.505 | 0.0381648 |
| LMCD1 | -1.502 | 0.0143526 |
| TBC1D16 | -1.499 | 0.0020172 |
| PARP2 | -1.499 | 0.0115077 |
| RASL12 | -1.496 | 0.0279286 |
| SEMA3A | -1.492 | 0.0383532 |
| INTS6 | -1.484 | 0.0122929 |
| DOK6 | -1.484 | 0.015621 |
| RGS7BP | -1.484 | 0.0173718 |
| CTNNAL1 | -1.483 | 0.0070604 |
| EFCAB1 | -1.482 | 0.0389987 |
| LARP6 | -1.473 | 0.0241129 |
| EPB41L5 | -1.472 | 0.0034687 |
| CNTNAP3 | -1.471 | 0.0204449 |
| DCLK1 | -1.47 | 0.0481977 |
| LOC254057 | -1.468 | 0.0345016 |
| Q7Z2X8 | -1.467 | 0.0189504 |
| CSMD2 | -1.465 | 0.0371771 |
| SNX31 | -1.462 | 0.0073478 |
| FGF2 | -1.462 | 0.0339889 |
| GNAI1 | -1.461 | 0.0408995 |
| PER2 | -1.457 | 0.0336804 |
| PCDH18 | -1.453 | 0.0093439 |
| ACSS3 | -1.453 | 0.0451971 |
| LOC729696 | -1.452 | 0.0416213 |
| FGF2 | -1.451 | 0.0379098 |
| C16orf52 | -1.449 | 0.0231937 |
| SIAH3 | -1.445 | 0.0376608 |
| PCDHB9 | -1.445 | 0.0463479 |
| CBX6 | -1.444 | 0.0218412 |
| TYRP1 | -1.442 | 0.0231273 |
| FECH | -1.441 | 0.0009416 |
| MYOM3 | -1.441 | 0.0323319 |
| ZNF92 | -1.437 | 0.0183067 |
| BDKRB2 | -1.437 | 0.0247288 |
| ZBTB34 | -1.435 | 0.0276693 |
| PCDHA4 | -1.434 | 0.0262032 |
| XLOC_011183 | -1.433 | 0.0350255 |
| WDR20 | -1.433 | 0.0419266 |
| PKNOX1 | -1.43 | 0.032784 |
| ISPD | -1.428 | 0.015807 |
| TUBB2B | -1.428 | 0.0232591 |
| MAPK10 | -1.428 | 0.0432058 |
| DPYSL4 | -1.427 | 0.0365155 |
| PHLDB2 | -1.426 | 0.0311641 |
| ATG2B | -1.424 | 0.0396384 |
| MAPT | -1.422 | 0.0307716 |
| COX18 | -1.419 | 0.0034192 |
| ERMAP | -1.418 | 0.0356287 |
| HNRNPA0 | -1.415 | 0.0083774 |
| ZFP37 | -1.412 | 0.0071929 |
| G2E3 | -1.411 | 0.0029031 |
| IL6ST | -1.411 | 0.0353623 |
| CACNG6 | -1.41 | 0.0485257 |
| XLOC_011183 | -1.408 | 0.041319 |
| DNLZ | -1.404 | 0.0053212 |
| DCAF5 | -1.404 | 0.0085567 |
| CTNNAL1 | -1.403 | 0.0029991 |
| DIDO1 | -1.401 | 0.0435903 |
| DOCK9 | -1.4 | 0.0017331 |
| ZCCHC24 | -1.4 | 0.0205038 |
| EIF2S1 | -1.398 | 0.0215806 |
| GRIK3 | -1.398 | 0.0349842 |
| TRPC1 | -1.397 | 0.0435433 |
| VAPB | -1.396 | 0.0171012 |
| NF2 | -1.394 | 0.0454251 |
| MSMP | -1.392 | 0.0063392 |
| FSD1L | -1.391 | 0.0016328 |
| NES | -1.387 | 0.0309507 |
| HDGFRP3 | -1.386 | 0.0427648 |
| PPP1R3C | -1.386 | 0.0496346 |
| PPP6C | -1.385 | 0.0364682 |
| TYW5 | -1.384 | 0.0019405 |
| CSTF2T | -1.384 | 0.0103713 |
| EFHA2 | -1.383 | 0.0340075 |
| C12orf53 | -1.381 | 0.0048021 |
| AMPH | -1.381 | 0.014464 |
| HLCS | -1.381 | 0.034474 |
| LARP6 | -1.378 | 0.0183919 |
| PLGLB1 | -1.376 | 0.0315294 |
| ZC3H12C | -1.374 | 0.0161313 |
| THRAP3 | -1.374 | 0.0366116 |
| FZD8 | -1.374 | 0.0452434 |
| LOC100506451 | -1.373 | 0.0081732 |
| PPP3R1 | -1.372 | 0.0211332 |
| CAMSAP1 | -1.371 | 0.0018888 |
| RAB14 | -1.37 | 0.0027984 |
| NAA30 | -1.368 | 0.0072222 |
| ST6GALNAC6 | -1.368 | 0.0174182 |
| ISCA2 | -1.366 | 0.0134992 |
| FBXW2 | -1.366 | 0.021587 |
| PID1 | -1.366 | 0.0399407 |
| TOR1B | -1.364 | 0.0099632 |
| NAA15 | -1.364 | 0.0342348 |
| ZNF528 | -1.363 | 0.0013472 |
| ENAH | -1.363 | 0.0229358 |
| MPRIP | -1.362 | 0.0264749 |
| ADO | -1.361 | 0.0116568 |
| FAM168B | -1.36 | 0.0026236 |
| EID1 | -1.36 | 0.0114389 |
| MBNL2 | -1.359 | 0.0165201 |
| ANKS6 | -1.359 | 0.0309607 |
| SUB1 | -1.358 | 0.0311905 |
| XLOC_l2_009131 | -1.358 | 0.0326917 |
| PPP1R36 | -1.358 | 0.0462708 |
| PSMD5 | -1.357 | 0.0075168 |
| ISPD | -1.357 | 0.0241457 |
| XLOC_011183 | -1.357 | 0.0496485 |
| ARF6 | -1.356 | 0.0049456 |
| TMEM194B | -1.355 | 0.0056833 |
| RANBP2 | -1.355 | 0.0182682 |
| XLOC_l2_004306 | -1.355 | 0.0247034 |
| CAV2 | -1.355 | 0.0323962 |
| PARK2 | -1.355 | 0.0437625 |
| ZNF461 | -1.355 | 0.0498952 |
| XLOC_011183 | -1.354 | 0.0201946 |
| KLF12 | -1.353 | 0.0457268 |
| DLST | -1.353 | 0.0499251 |
| HBS1L | -1.352 | 0.0054164 |
| WBP2NL | -1.352 | 0.0106507 |
| CCT5 | -1.352 | 0.0159148 |
| TET1 | -1.352 | 0.0160167 |
| ZNF706 | -1.352 | 0.0173132 |
| PRTG | -1.349 | 0.0018992 |
| C17orf67 | -1.348 | 0.0138102 |
| GABPB1 | -1.347 | 0.0296943 |
| LOC285147 | -1.346 | 0.0145581 |
| SBDS | -1.345 | 0.0121984 |
| KIAA0368 | -1.345 | 0.0142986 |
| ZNF117 | -1.345 | 0.0204336 |
| PNMA1 | -1.345 | 0.0234564 |
| IRS1 | -1.345 | 0.0388367 |
| LOC157562 | -1.344 | 0.0428212 |
| CALM1 | -1.343 | 0.0055396 |
| RECQL | -1.343 | 0.01867 |
| TSPYL1 | -1.342 | 0.0149802 |
| INSIG2 | -1.342 | 0.0339921 |
| ISPD | -1.34 | 0.0018403 |
| GOLT1B | -1.34 | 0.0149781 |
| FAM169A | -1.34 | 0.0251469 |
| POU6F1 | -1.338 | 0.0077142 |
| ITGA1 | -1.338 | 0.0291625 |
| GSN | -1.336 | 0.0220404 |
| VSTM4 | -1.336 | 0.0366054 |
| CXorf57 | -1.336 | 0.0412611 |
| TRDMT1 | -1.335 | 0.0077705 |
| PCDHB15 | -1.335 | 0.0092868 |
| DCAF8 | -1.335 | 0.0463455 |
| CBR1 | -1.334 | 0.0055946 |
| PTPN13 | -1.334 | 0.005648 |
| BTBD7 | -1.334 | 0.0267381 |
| FANCC | -1.334 | 0.0274129 |
| CNOT4 | -1.334 | 0.0297554 |
| CDCA4 | -1.333 | 0.0238807 |
| C16orf46 | -1.333 | 0.0350811 |
| PHF2 | -1.333 | 0.0432717 |
| TTC30A | -1.332 | 0.0039695 |
| DCAF10 | -1.332 | 0.0167335 |
| UBR3 | -1.332 | 0.0217297 |
| ALG2 | -1.332 | 0.0250204 |
| ZNF790 | -1.332 | 0.0280271 |
| MID2 | -1.331 | 0.0017273 |
| SESTD1 | -1.33 | 0.0257506 |
| UBQLN1 | -1.329 | 0.0085287 |
| TMEM22 | -1.328 | 0.0046666 |
| SPTBN1 | -1.328 | 0.034786 |
| SECISBP2L | -1.326 | 0.0447382 |
| PSD3 | -1.326 | 0.0469225 |
| PPP1R1C | -1.325 | 0.023589 |
| C20orf11 | -1.325 | 0.0485841 |
| TOR1AIP1 | -1.324 | 0.039968 |
| ZNF790 | -1.323 | 0.013738 |
| RGS6 | -1.323 | 0.034097 |
| SMC1A | -1.322 | 0.0134229 |
| SENP6 | -1.321 | 0.032541 |
| MAVS | -1.321 | 0.036047 |
| TMEM128 | -1.32 | 0.0268248 |
| FAM165B | -1.32 | 0.0382647 |
| XLOC_012870 | -1.319 | 0.004477 |
| ANKDD1A | -1.319 | 0.0087783 |
| MTBP | -1.319 | 0.0259161 |
| ZNF839 | -1.318 | 0.0104208 |
| PPP1CB | -1.318 | 0.0236215 |
| SRSF12 | -1.318 | 0.0303977 |
| LRRC57 | -1.318 | 0.0304915 |
| CCDC40 | -1.317 | 0.0164426 |
| ST3GAL3 | -1.317 | 0.0291731 |
| GATSL3 | -1.317 | 0.0304356 |
| C6orf204 | -1.317 | 0.0323661 |
| SENP6 | -1.317 | 0.036586 |
| MTRR | -1.316 | 0.024844 |
| SPTLC1 | -1.315 | 0.0136274 |
| DAAM1 | -1.315 | 0.018322 |
| LRRC16A | -1.314 | 0.0204323 |
| ALG13 | -1.314 | 0.0266884 |
| HABP4 | -1.313 | 0.0183602 |
| CCDC121 | -1.313 | 0.0287891 |
| IMPAD1 | -1.313 | 0.0457933 |
| TECTA | -1.312 | 0.0032255 |
| U2SURP | -1.311 | 0.007356 |
| KHNYN | -1.311 | 0.038547 |
| SLC9A8 | -1.311 | 0.0430287 |
| DCAF4 | -1.31 | 0.0130252 |
| PACS2 | -1.31 | 0.0190535 |
| MSRB2 | -1.309 | 0.0284339 |
| C9orf40 | -1.308 | 0.0272588 |
| PSME4 | -1.307 | 0.0185607 |
| C5orf44 | -1.306 | 0.0499201 |
| ZBTB38 | -1.303 | 0.0156246 |
| PROX2 | -1.302 | 0.0159542 |
| GCC1 | -1.302 | 0.0192609 |
| LOC100505641 | -1.302 | 0.0439216 |
| EPHA7 | -1.301 | 0.0256681 |
| FAM115A | -1.301 | 0.0390497 |
| C10orf2 | -1.301 | 0.0395243 |
| FOXJ2 | -1.3 | 0.0165068 |
| HSPB1 | -1.3 | 0.0413323 |
| NRL | -1.3 | 0.0427717 |
| BZW1 | -1.299 | 0.0127134 |
| SRSF6 | -1.299 | 0.0241619 |
| FBXO5 | -1.299 | 0.0297156 |
| C9orf69 | -1.299 | 0.0345106 |
| RUFY2 | -1.298 | 0.0083668 |
| SLC24A1 | -1.298 | 0.0304107 |
| HSF2 | -1.297 | 0.0051288 |
| PLCB1 | -1.297 | 0.0090055 |
| XLOC_003204 | -1.297 | 0.0220667 |
| CUBN | -1.297 | 0.030289 |
| ITPRIPL2 | -1.295 | 0.012232 |
| SPATA9 | -1.295 | 0.0256694 |
| SPATS2L | -1.294 | 0.0111428 |
| MIS12 | -1.294 | 0.0284109 |
| CCDC6 | -1.294 | 0.0489762 |
| OXR1 | -1.292 | 0.0234552 |
| LIPI | -1.292 | 0.0367542 |
| LRP11 | -1.292 | 0.0392546 |
| SHQ1 | -1.291 | 0.0200493 |
| BRMS1L | -1.291 | 0.0278754 |
| SMAD2 | -1.291 | 0.0355433 |
| PEX2 | -1.291 | 0.0410915 |
| PLEKHF2 | -1.291 | 0.0470369 |
| TRAPPC8 | -1.29 | 0.0082299 |
| XLOC_l2_000706 | -1.289 | 0.0152516 |
| XLOC_011184 | -1.288 | 0.0394424 |
| GRIK3 | -1.288 | 0.0431167 |
| TTLL11 | -1.287 | 0.0232624 |
| GRID1 | -1.287 | 0.0287541 |
| FAM81B | -1.285 | 0.0146854 |
| NAALAD2 | -1.285 | 0.0357603 |
| BDP1 | -1.285 | 0.0374121 |
| SLCO3A1 | -1.284 | 0.0301366 |
| CREBZF | -1.283 | 0.0323459 |
| UBE2J1 | -1.283 | 0.0355875 |
| NPHP1 | -1.282 | 0.0325848 |
| XLOC_l2_006648 | -1.282 | 0.0396047 |
| XLOC_011184 | -1.282 | 0.0437613 |
| VCPIP1 | -1.28 | 0.0069461 |
| PTPN12 | -1.28 | 0.0480265 |
| AADAT | -1.279 | 0.0187014 |
| PHF13 | -1.279 | 0.0255493 |
| NAALADL2 | -1.279 | 0.0447444 |
| TRIM6 | -1.279 | 0.0478706 |
| AKTIP | -1.279 | 0.0489297 |
| P60896 | -1.278 | 0.0076783 |
| AMN1 | -1.278 | 0.0211961 |
| AQR | -1.277 | 0.0328205 |
| PHF14 | -1.277 | 0.0436743 |
| AMOTL1 | -1.276 | 0.0023743 |
| NUDT21 | -1.274 | 0.0302592 |
| STARD13 | -1.273 | 0.0365823 |
| ZNF160 | -1.273 | 0.036912 |
| ZNF416 | -1.273 | 0.0499579 |
| RSPH4A | -1.272 | 0.0129547 |
| PLCB1 | -1.272 | 0.0203492 |
| NOL10 | -1.272 | 0.0203677 |
| TCEANC | -1.271 | 0.0303344 |
| APOM | -1.271 | 0.0383171 |
| C10orf88 | -1.27 | 0.0218755 |
| ASB1 | -1.269 | 0.0005683 |
| INPP5A | -1.269 | 0.0142967 |
| SETX | -1.269 | 0.0478814 |
| B3GALNT1 | -1.268 | 0.0040993 |
| VTI1A | -1.268 | 0.0077501 |
| SNX3 | -1.268 | 0.0120595 |
| ZNF83 | -1.268 | 0.0156328 |
| RCE1 | -1.268 | 0.0424668 |
| TBX2 | -1.267 | 0.0263151 |
| NENF | -1.267 | 0.0382101 |
| TAF2 | -1.266 | 0.0184209 |
| LOC100506190 | -1.266 | 0.0221168 |
| XLOC_001952 | -1.266 | 0.0292547 |
| ARPC5L | -1.266 | 0.0320034 |
| LIN52 | -1.266 | 0.0395405 |
| NOL10 | -1.266 | 0.0424265 |
| GRID2IP | -1.266 | 0.0480501 |
| NEK8 | -1.266 | 0.0490617 |
| SORBS1 | -1.265 | 0.0324545 |
| MKKS | -1.264 | 0.0124814 |
| P39188 | -1.264 | 0.0246573 |
| C21orf2 | -1.264 | 0.0345757 |
| RUNDC3B | -1.264 | 0.0490628 |
| ZNF662 | -1.263 | 0.0475041 |
| ANGPTL3 | -1.263 | 0.0485205 |
| RC3H2 | -1.262 | 0.0190298 |
| ATP2A1 | -1.261 | 0.0280758 |
| KCTD10 | -1.261 | 0.0395771 |
| TCEA2 | -1.26 | 0.0116179 |
| TSPYL4 | -1.26 | 0.0217051 |
| PKD1 | -1.26 | 0.02651 |
| UBR7 | -1.26 | 0.0336298 |
| SBDS | -1.259 | 0.0058772 |
| CYB5B | -1.259 | 0.0413654 |
| DOCK9 | -1.258 | 0.0222817 |
| TMEM203 | -1.257 | 0.0319121 |
| TRIM6 | -1.257 | 0.0326236 |
| AMD1 | -1.257 | 0.0481019 |
| NGDN | -1.256 | 0.0036334 |
| MRPL19 | -1.256 | 0.0093123 |
| SSNA1 | -1.254 | 0.0042238 |
| NSMAF | -1.254 | 0.0190629 |
| HAUS6 | -1.254 | 0.0350207 |
| FAM172A | -1.253 | 0.0132098 |
| ZNF592 | -1.253 | 0.0218151 |
| ZNF432 | -1.252 | 0.0127612 |
| ASF1A | -1.252 | 0.0240044 |
| PDPK1 | -1.252 | 0.0424913 |
| HEXIM1 | -1.252 | 0.043718 |
| AHCTF1 | -1.251 | 0.0056588 |
| LYRM5 | -1.251 | 0.0134581 |
| ZFP161 | -1.251 | 0.036928 |
| GPR107 | -1.251 | 0.0420283 |
| TET1 | -1.251 | 0.0454296 |
| AGPS | -1.25 | 0.0051666 |
| ELF5 | -1.25 | 0.0192131 |
| CNOT4 | -1.25 | 0.0387904 |
| ST3GAL3 | -1.249 | 0.0260457 |
| PCDHB11 | -1.248 | 0.0300832 |
| RTF1 | -1.247 | 0.0030593 |
| VAPB | -1.247 | 0.0070501 |
| MUM1 | -1.247 | 0.0266738 |
| NUDCD3 | -1.246 | 0.0005137 |
| PKN1 | -1.246 | 0.00839 |
| FAM168A | -1.246 | 0.0274332 |
| C9orf5 | -1.246 | 0.0331056 |
| C8orf83 | -1.246 | 0.0437517 |
| PPM1B | -1.246 | 0.0449363 |
| STK38L | -1.245 | 0.0340701 |
| CCDC17 | -1.245 | 0.0362732 |
| ZNF304 | -1.245 | 0.0378646 |
| RFX1 | -1.245 | 0.0402391 |
| TRIM56 | -1.244 | 0.0111292 |
| HAUS2 | -1.244 | 0.0252514 |
| HNRPDL | -1.244 | 0.0327559 |
| ERP44 | -1.244 | 0.0434904 |
| ACR | -1.244 | 0.0467819 |
| PPP1R32 | -1.243 | 0.0359261 |
| FOXD3 | -1.243 | 0.0387239 |
| LOC153546 | -1.242 | 0.0210786 |
| POR | -1.242 | 0.0393286 |
| NR1H2 | -1.242 | 0.0450102 |
| KLHL36 | -1.241 | 0.024081 |
| ITGB1BP1 | -1.241 | 0.024301 |
| CRLF2 | -1.241 | 0.0331079 |
| PPP2R5C | -1.24 | 0.0001322 |
| RRP1B | -1.24 | 0.0221559 |
| ELMOD2 | -1.24 | 0.048847 |
| TLE1 | -1.239 | 0.0088302 |
| ZNF507 | -1.239 | 0.0158731 |
| ZNF484 | -1.239 | 0.0255661 |
| RNF32 | -1.239 | 0.0304663 |
| UTP23 | -1.238 | 0.0103934 |
| NAA35 | -1.238 | 0.0271996 |
| PHC1 | -1.238 | 0.0298179 |
| PDS5B | -1.238 | 0.0315051 |
| ZNF655 | -1.238 | 0.0467344 |
| H2AFV | -1.237 | 0.0125823 |
| DGKK | -1.237 | 0.0154437 |
| BRD3 | -1.237 | 0.037993 |
| MRPL19 | -1.236 | 0.0165825 |
| CRTAP | -1.236 | 0.0184724 |
| ZADH2 | -1.235 | 0.0326572 |
| SLC12A4 | -1.235 | 0.0349793 |
| MKLN1 | -1.235 | 0.0357279 |
| TRIM32 | -1.233 | 0.011506 |
| ABL1 | -1.233 | 0.0133498 |
| FBXW4 | -1.233 | 0.045546 |
| FKTN | -1.232 | 0.0206159 |
| STAM2 | -1.232 | 0.0347123 |
| COL6A6 | -1.232 | 0.0365396 |
| DICER1 | -1.232 | 0.0407924 |
| BMI1 | -1.231 | 0.019325 |
| ZRANB1 | -1.23 | 0.0071971 |
| CNOT4 | -1.23 | 0.014155 |
| ZBTB43 | -1.23 | 0.0173659 |
| GMFB | -1.23 | 0.0440058 |
| MED6 | -1.229 | 0.0014171 |
| ZNF510 | -1.228 | 0.0142006 |
| ABI1 | -1.228 | 0.0294124 |
| ARL5A | -1.228 | 0.0438544 |
| EIF4ENIF1 | -1.228 | 0.0453256 |
| GTDC1 | -1.227 | 0.0384989 |
| WDR33 | -1.226 | 0.0083899 |
| MOAP1 | -1.225 | 0.0159126 |
| CAMSAP1 | -1.224 | 0.0075793 |
| SEPW1 | -1.224 | 0.0278703 |
| METTL21D | -1.224 | 0.030199 |
| KIF7 | -1.224 | 0.0458912 |
| CXorf26 | -1.223 | 0.0126609 |
| PARD3 | -1.223 | 0.0355771 |
| PLCB1 | -1.222 | 0.0183439 |
| SLC44A2 | -1.222 | 0.0266895 |
| MAP4K5 | -1.222 | 0.0324197 |
| TLE4 | -1.221 | 0.0494 |
| ATP10D | -1.22 | 0.0161563 |
| MYT1 | -1.22 | 0.0181307 |
| YLPM1 | -1.22 | 0.0300058 |
| DOCK9 | -1.22 | 0.0301306 |
| PMS1 | -1.22 | 0.0347062 |
| HIC2 | -1.22 | 0.0400474 |
| LIG4 | -1.22 | 0.0436585 |
| MORC2 | -1.22 | 0.0475534 |
| COQ4 | -1.22 | 0.0494643 |
| CENPT | -1.219 | 0.0202509 |
| PSMC1 | -1.219 | 0.0434177 |
| MEGF11 | -1.218 | 0.0064378 |
| SFT2D3 | -1.218 | 0.0152221 |
| MTHFD2L | -1.218 | 0.0241796 |
| ZNF658 | -1.217 | 0.0332671 |
| PARD3 | -1.216 | 0.037143 |
| GTF3C4 | -1.215 | 0.0008939 |
| NGRN | -1.215 | 0.003297 |
| WDR33 | -1.215 | 0.0347117 |
| TBL1Y | -1.215 | 0.0397065 |
| LOC400620 | -1.214 | 0.023675 |
| LOC100132292 | -1.214 | 0.0421546 |
| TECPR2 | -1.213 | 0.0056831 |
| UPF3A | -1.213 | 0.0112339 |
| TSN | -1.213 | 0.0290276 |
| ZNF818P | -1.213 | 0.0299376 |
| TRIP11 | -1.213 | 0.0306302 |
| TBL1X | -1.213 | 0.0342209 |
| TLE1 | -1.212 | 0.0067043 |
| RASA1 | -1.212 | 0.0199306 |
| FAM123B | -1.211 | 0.0425378 |
| TMEM18 | -1.21 | 0.0172281 |
| KIAA1429 | -1.21 | 0.0226513 |
| APPBP2 | -1.21 | 0.0252854 |
| LOC100132146 | -1.21 | 0.0337094 |
| TSTD2 | -1.209 | 0.0020492 |
| METTL3 | -1.209 | 0.0296626 |
| SECISBP2 | -1.209 | 0.0328491 |
| TEAD1 | -1.208 | 0.014812 |
| RHBDD2 | -1.208 | 0.0464073 |
| ZMYND17 | -1.207 | 0.0217843 |
| SENP5 | -1.207 | 0.0227054 |
| C2orf3 | -1.207 | 0.039203 |
| FDXACB1 | -1.207 | 0.0441461 |
| U2AF1 | -1.206 | 0.0288201 |
| PIGH | -1.206 | 0.0423174 |
| ZNF682 | -1.206 | 0.0455659 |
| LOC100131599 | -1.206 | 0.0483342 |
| LUC7L2 | -1.205 | 0.0027354 |
| AGAP1 | -1.204 | 0.0129596 |
| AMELX | -1.204 | 0.0160668 |
| KCMF1 | -1.204 | 0.0161818 |
| OPA1 | -1.203 | 0.005149 |
| MLH3 | -1.203 | 0.019154 |
| ANTXR2 | -1.203 | 0.0329806 |
| SPERT | -1.203 | 0.0341214 |
| TCEAL4 | -1.202 | 0.0269399 |
| OSCP1 | -1.202 | 0.033329 |
| TMEM128 | -1.202 | 0.0355175 |
| BMI1 | -1.201 | 0.0128048 |
| ARHGAP21 | -1.201 | 0.0267705 |
| GRIK3 | -1.201 | 0.0284369 |
| NUDT15 | -1.2 | 0.029988 |
| ZNF669 | -1.2 | 0.042701 |
| KANK1 | -1.2 | 0.0431225 |
| XLOC_l2_011798 | -1.199 | 0.0042992 |
| MAVS | -1.199 | 0.0302687 |
| NCKAP1 | -1.199 | 0.0336054 |
| RC3H2 | -1.198 | 0.0115711 |
| ARHGAP19 | -1.198 | 0.0164114 |
| PYROXD1 | -1.198 | 0.0459939 |
| XLOC_002872 | -1.197 | 0.0309395 |
| MNAT1 | -1.197 | 0.0411441 |
| TMEM43 | -1.197 | 0.0432905 |
| SLTM | -1.197 | 0.049973 |
| XLOC_012365 | -1.196 | 0.0072398 |
| MYO9A | -1.196 | 0.0262059 |
| CCDC111 | -1.196 | 0.0276775 |
| NSFL1C | -1.195 | 0.0066048 |
| SCMH1 | -1.195 | 0.0140125 |
| TNRC6A | -1.195 | 0.0240793 |
| POLI | -1.194 | 0.0459598 |
| KCTD18 | -1.193 | 0.0025617 |
| TTC34 | -1.193 | 0.0093205 |
| ZNF429 | -1.193 | 0.0196719 |
| TPR | -1.193 | 0.0278059 |
| ENKUR | -1.193 | 0.0317015 |
| LTBP3 | -1.193 | 0.0322733 |
| RBX1 | -1.193 | 0.0480217 |
| CUL4B | -1.192 | 0.0424267 |
| PCDHB2 | -1.192 | 0.0464966 |
| ARHGAP5 | -1.192 | 0.0482014 |
| ARPC5 | -1.19 | 0.0436045 |
| TBL1X | -1.189 | 0.0275915 |
| SNW1 | -1.189 | 0.0456448 |
| HERC2 | -1.188 | 0.0321115 |
| RBM41 | -1.188 | 0.0425829 |
| DOLK | -1.188 | 0.0445767 |
| GMFB | -1.188 | 0.047625 |
| FBXW2 | -1.187 | 0.0119501 |
| ZNF134 | -1.187 | 0.0228835 |
| DNAJC1 | -1.187 | 0.026797 |
| XLOC_005144 | -1.187 | 0.0340471 |
| MYL3 | -1.187 | 0.0412489 |
| LOC100506847 | -1.186 | 0.0089158 |
| THOC5 | -1.186 | 0.0215463 |
| ZNF496 | -1.186 | 0.0270706 |
| BTBD7 | -1.185 | 0.0071552 |
| MPP5 | -1.185 | 0.0074734 |
| C2orf68 | -1.185 | 0.0200722 |
| UBQLN1 | -1.185 | 0.0213352 |
| C7orf49 | -1.185 | 0.033183 |
| FUBP3 | -1.185 | 0.0379532 |
| FAM92A1 | -1.185 | 0.0463295 |
| EHMT1 | -1.184 | 0.0333543 |
| POT1 | -1.184 | 0.0340437 |
| ZNF24 | -1.183 | 0.0330586 |
| GSTZ1 | -1.181 | 0.0461855 |
| RALGAPA1 | -1.18 | 0.0272995 |
| ZNF141 | -1.18 | 0.0334803 |
| XLOC_007090 | -1.179 | 0.0189848 |
| EHMT1 | -1.179 | 0.0192429 |
| SLC39A3 | -1.179 | 0.0356045 |
| SET | -1.178 | 0.0118509 |
| WDYHV1 | -1.178 | 0.0334619 |
| SLC35B3 | -1.178 | 0.0346511 |
| ZNF207 | -1.178 | 0.0375744 |
| LOC100131719 | -1.178 | 0.0423156 |
| RAB3GAP1 | -1.177 | 0.0112962 |
| NEURL1B | -1.177 | 0.0212075 |
| RBM12 | -1.177 | 0.0315893 |
| BMS1 | -1.177 | 0.0318982 |
| DOCK9 | -1.177 | 0.0498453 |
| ANAPC13 | -1.176 | 0.0108645 |
| C17orf57 | -1.176 | 0.0111619 |
| IPPK | -1.175 | 0.0192793 |
| PSMD5 | -1.174 | 0.0330643 |
| PURB | -1.173 | 0.0145853 |
| CHD9 | -1.173 | 0.0156811 |
| PRCC | -1.173 | 0.0360978 |
| INTS6 | -1.173 | 0.0460527 |
| PSMD5 | -1.172 | 0.0193491 |
| LOC100130057 | -1.172 | 0.0433439 |
| CSNK2A1 | -1.172 | 0.0454093 |
| RBM17 | -1.171 | 0.0176136 |
| MRRF | -1.171 | 0.0289845 |
| NF2 | -1.171 | 0.0363525 |
| SETP20 | -1.171 | 0.0432941 |
| AKT2 | -1.17 | 0.0123405 |
| SEC22A | -1.17 | 0.0254441 |
| SRRM3 | -1.17 | 0.0492742 |
| CDK8 | -1.168 | 0.0219942 |
| ATMIN | -1.167 | 0.024646 |
| CLUAP1 | -1.167 | 0.0328264 |
| LTK | -1.167 | 0.0436264 |
| ZNF169 | -1.167 | 0.0496582 |
| AEBP2 | -1.166 | 0.0322165 |
| psiTPTE22 | -1.166 | 0.0451687 |
| WBSCR16 | -1.166 | 0.045258 |
| ZACN | -1.165 | 0.0418319 |
| ZNF737 | -1.165 | 0.042958 |
| MBNL2 | -1.164 | 0.0366216 |
| C9orf64 | -1.164 | 0.043511 |
| MXRA7 | -1.163 | 0.031045 |
| ZNF311 | -1.163 | 0.0336041 |
| LOC100506190 | -1.163 | 0.0452489 |
| NUBPL | -1.162 | 0.0344214 |
| MZT2A | -1.162 | 0.0360034 |
| ZNF20 | -1.162 | 0.048497 |
| TBC1D25 | -1.161 | 0.011966 |
| DFNB59 | -1.161 | 0.0281245 |
| PHF19 | -1.161 | 0.0363734 |
| CBWD5 | -1.161 | 0.0377439 |
| INPP5A | -1.161 | 0.0411965 |
| C9orf102 | -1.161 | 0.0463135 |
| SEPHS1 | -1.159 | 0.0290204 |
| ELOF1 | -1.159 | 0.0332914 |
| BRD3 | -1.158 | 0.0261493 |
| ZNF776 | -1.157 | 0.0232724 |
| CCDC127 | -1.157 | 0.0470097 |
| XLOC_l2_008226 | -1.156 | 0.0289799 |
| FBXL12 | -1.156 | 0.0420771 |
| TBC1D20 | -1.155 | 0.0256353 |
| C1orf182 | -1.155 | 0.0283234 |
| SMCR7L | -1.155 | 0.0338448 |
| TRMT5 | -1.154 | 0.0401715 |
| ZNF675 | -1.154 | 0.0407967 |
| C19orf56 | -1.154 | 0.0438585 |
| ZNF714 | -1.153 | 0.0054779 |
| KIAA1737 | -1.152 | 0.0424014 |
| BTBD7 | -1.151 | 0.0121948 |
| PRMT2 | -1.151 | 0.0478609 |
| LOC100132987 | -1.15 | 0.0351213 |
| PRPF18 | -1.15 | 0.0408366 |
| RABGAP1 | -1.149 | 0.0243336 |
| TXNRD3 | -1.149 | 0.0325331 |
| UBR5 | -1.149 | 0.0327728 |
| CDK5RAP2 | -1.149 | 0.0426024 |
| MTA1 | -1.149 | 0.0443395 |
| SKOR1 | -1.147 | 0.0375277 |
| STK35 | -1.146 | 0.0365443 |
| USP42 | -1.146 | 0.0470646 |
| XLOC_007954 | -1.145 | 0.0274577 |
| SENP1 | -1.145 | 0.0415522 |
| TMEM222 | -1.144 | 0.0168526 |
| KIAA1456 | -1.143 | 0.0045642 |
| OGFOD2 | -1.143 | 0.0415702 |
| ANKRD11 | -1.142 | 0.0133704 |
| PPM1A | -1.142 | 0.0493557 |
| FAM115A | -1.141 | 0.0297883 |
| CUL3 | -1.14 | 0.0383258 |
| ZNF727 | -1.139 | 0.0123922 |
| ZNF254 | -1.139 | 0.0357742 |
| XLOC_005246 | -1.139 | 0.0426964 |
| WDR53 | -1.138 | 0.0127797 |
| VTA1 | -1.138 | 0.0346874 |
| HERPUD2 | -1.138 | 0.0428242 |
| ILF3 | -1.136 | 0.0421181 |
| TFDP2 | -1.135 | 0.0362709 |
| ZBTB47 | -1.133 | 0.0370783 |
| C14orf118 | -1.129 | 0.0308057 |
| MCM9 | -1.129 | 0.0353941 |
| MARK3 | -1.128 | 0.0450913 |
| GOLGA5 | -1.127 | 0.0440274 |
| MGA | -1.126 | 0.040968 |
| SCAF4 | -1.125 | 0.04471 |
| SEC16A | -1.124 | 0.0219974 |
| MTMR2 | -1.123 | 0.0247175 |
| TIMM23 | -1.123 | 0.0359586 |
| AWAT2 | -1.123 | 0.0428652 |
| TMEM151B | -1.121 | 0.0474364 |
| C5orf42 | -1.119 | 0.0499067 |
| VPS39 | -1.118 | 0.0167417 |
| C9orf78 | -1.118 | 0.0391377 |
| CNKSR2 | -1.116 | 0.0347113 |
| SCYL2 | -1.115 | 0.0456519 |
| HDAC2 | -1.114 | 0.0425925 |
| MBNL3 | -1.112 | 0.0445175 |
| TEX12 | -1.108 | 0.0380645 |
| TCF25 | -1.106 | 0.0224564 |
| SMARCE1 | -1.105 | 0.0482803 |
| TNRC18 | -1.104 | 0.0202695 |
| PPP1R42 | -1.096 | 0.0448256 |
| MTRNR2L2 | -1.094 | 0.0205023 |
| ND2 | -1.094 | 0.0344907 |
| UIMC1 | -1.094 | 0.0369113 |
| XLOC_005500 | -1.092 | 0.0363369 |
| SERPINC1 | -1.08 | 0.0422871 |
| C9orf171 | -1.079 | 0.0067085 |
| XLOC_007268 | -1.077 | 0.0485598 |
| XLOC_003333 | -1.068 | 0.0139042 |
| DEFB119 | -1.065 | 0.0497354 |
| LOC100288568 | -1.057 | 0.0219496 |
| MMD2 | -1.051 | 0.0407068 |
| XLOC_008938 | -1.05 | 0.043401 |
| ZNF530 | -1.036 | 0.0203377 |
| PRSS55 | 1.056 | 0.0123117 |
| RBM10 | 1.07 | 0.0193152 |
| XLOC_002100 | 1.07 | 0.0482139 |
| CERCAM | 1.071 | 0.048537 |
| XLOC_001422 | 1.079 | 0.026733 |
| CLRN1 | 1.08 | 0.044409 |
| XLOC_004491 | 1.085 | 0.0157773 |
| OR4K15 | 1.087 | 0.0272687 |
| XLOC_004713 | 1.09 | 0.0192144 |
| TXN2 | 1.1 | 0.0374152 |
| EXD3 | 1.101 | 0.030435 |
| TJAP1 | 1.102 | 0.018165 |
| EDA | 1.104 | 0.0485256 |
| TELO2 | 1.105 | 0.0373698 |
| HAB1 | 1.106 | 0.0429142 |
| ACBD7 | 1.107 | 0.0204476 |
| CHMP6 | 1.11 | 0.0228142 |
| OR10W1 | 1.11 | 0.0244494 |
| RNF123 | 1.11 | 0.0445607 |
| RETN | 1.11 | 0.0456191 |
| FAM171A2 | 1.112 | 0.0400663 |
| CLPB | 1.114 | 0.022828 |
| POTEA | 1.114 | 0.0272446 |
| GPATCH3 | 1.115 | 0.0152653 |
| ACTL6B | 1.118 | 0.0462702 |
| TNR | 1.119 | 0.0064122 |
| NPEPL1 | 1.119 | 0.0327755 |
| ZNF235 | 1.119 | 0.0386968 |
| LOC100506447 | 1.119 | 0.0491334 |
| FAM163B | 1.121 | 0.0256943 |
| ZNF639 | 1.121 | 0.0272097 |
| EBP | 1.121 | 0.0386198 |
| PRKAR1B | 1.121 | 0.0469259 |
| ATRNL1 | 1.122 | 0.0229167 |
| CIB3 | 1.122 | 0.0286778 |
| MLL4 | 1.122 | 0.0476063 |
| PSTPIP1 | 1.124 | 0.0465151 |
| PRG3 | 1.125 | 0.0286812 |
| MORN3 | 1.125 | 0.0416516 |
| LOC100506328 | 1.126 | 0.0439748 |
| CTNNA2 | 1.126 | 0.0492935 |
| MGAT1 | 1.127 | 0.0270162 |
| CDK11B | 1.127 | 0.0348381 |
| PRSS57 | 1.128 | 0.0454504 |
| NPAS1 | 1.129 | 0.0249169 |
| PHF21B | 1.129 | 0.0330089 |
| SAMD4A | 1.129 | 0.04912 |
| DEFB116 | 1.131 | 0.0322895 |
| PPM1F | 1.133 | 0.0081114 |
| POU1F1 | 1.133 | 0.0130164 |
| MRGPRD | 1.133 | 0.0419688 |
| CRHR1 | 1.134 | 0.0362973 |
| GRXCR2 | 1.135 | 0.0300042 |
| LOC100129115 | 1.135 | 0.0480401 |
| SPATA16 | 1.136 | 0.0468924 |
| HSPA12B | 1.137 | 0.0197873 |
| PRAMEF3 | 1.137 | 0.0468353 |
| XLOC_l2_006013 | 1.138 | 0.0233825 |
| C10orf112 | 1.138 | 0.0279097 |
| WBSCR22 | 1.138 | 0.048526 |
| DRD3 | 1.139 | 0.0187805 |
| LOC283516 | 1.139 | 0.0457992 |
| XLOC_012249 | 1.139 | 0.0483936 |
| LOC100131066 | 1.139 | 0.049925 |
| OR4C3 | 1.14 | 0.0334905 |
| XLOC_010707 | 1.14 | 0.0449727 |
| TRIM11 | 1.14 | 0.0482812 |
| FLT4 | 1.141 | 0.0111766 |
| C19orf68 | 1.141 | 0.021194 |
| BPIFC | 1.141 | 0.0454473 |
| BAALC | 1.143 | 0.0138415 |
| HES6 | 1.143 | 0.037919 |
| OR5AS1 | 1.144 | 0.0083194 |
| FLJ26086 | 1.144 | 0.0275448 |
| HAUS5 | 1.144 | 0.0362026 |
| PRPF19 | 1.144 | 0.038332 |
| CLEC4M | 1.145 | 0.0376707 |
| TMC1 | 1.145 | 0.04218 |
| XLOC_006756 | 1.146 | 0.0100835 |
| C14orf109 | 1.146 | 0.017599 |
| TMEM234 | 1.146 | 0.0214758 |
| LHFPL3 | 1.146 | 0.0349141 |
| SPANXN4 | 1.146 | 0.0360272 |
| XLOC_005566 | 1.146 | 0.037591 |
| RDH13 | 1.147 | 0.0121578 |
| XLOC_l2_001064 | 1.147 | 0.0201194 |
| XLOC_005228 | 1.147 | 0.0402312 |
| PRLH | 1.148 | 0.0134095 |
| KIAA1984 | 1.148 | 0.04016 |
| LOC728763 | 1.148 | 0.0412403 |
| AMDHD2 | 1.149 | 0.0101023 |
| XLOC_005952 | 1.149 | 0.0178376 |
| XLOC_007586 | 1.149 | 0.0219965 |
| C10orf35 | 1.149 | 0.0225472 |
| CDX1 | 1.149 | 0.0271102 |
| WDR33 | 1.149 | 0.0342794 |
| P39189 | 1.15 | 0.0065832 |
| ZGLP1 | 1.15 | 0.0332413 |
| SLC2A5 | 1.15 | 0.0361621 |
| C10orf96 | 1.151 | 0.0474263 |
| LRFN2 | 1.152 | 0.0293658 |
| LOC100130817 | 1.152 | 0.0417286 |
| LOC100507050 | 1.153 | 0.007696 |
| UPB1 | 1.153 | 0.0084688 |
| UFSP1 | 1.153 | 0.0217337 |
| DRGX | 1.154 | 0.0185844 |
| VIPR2 | 1.154 | 0.0259394 |
| MAGED4B | 1.154 | 0.0323022 |
| BEST3 | 1.154 | 0.0414187 |
| LOC100506310 | 1.155 | 0.0344387 |
| SUGP2 | 1.155 | 0.0401378 |
| CELF3 | 1.155 | 0.0454366 |
| MVK | 1.156 | 0.0234829 |
| RGS12 | 1.157 | 0.0406459 |
| C3orf22 | 1.158 | 0.0353356 |
| MATK | 1.158 | 0.0481063 |
| GALNT9 | 1.159 | 0.0083402 |
| XLOC_l2_006267 | 1.159 | 0.0287015 |
| XLOC_005979 | 1.159 | 0.0294789 |
| DERL3 | 1.159 | 0.0433104 |
| XLOC_002715 | 1.16 | 0.0367166 |
| XLOC_014105 | 1.161 | 0.0071334 |
| LOC100130097 | 1.161 | 0.0194898 |
| TTLL8 | 1.161 | 0.0373143 |
| LOC100129069 | 1.162 | 0.0189834 |
| KALRN | 1.163 | 0.0126586 |
| OMP | 1.163 | 0.0350188 |
| XLOC_014025 | 1.163 | 0.0391742 |
| XLOC_001602 | 1.164 | 0.0374843 |
| Q96G65 | 1.165 | 0.0208166 |
| TRPM5 | 1.165 | 0.0270877 |
| LOC440330 | 1.165 | 0.0379447 |
| XLOC_l2_004594 | 1.165 | 0.0402833 |
| SYCE3 | 1.165 | 0.042694 |
| EML2 | 1.166 | 0.0246509 |
| PGPEP1 | 1.166 | 0.0329612 |
| XLOC_l2_004944 | 1.166 | 0.0405193 |
| LIPF | 1.167 | 0.0030357 |
| ZNF467 | 1.167 | 0.0114691 |
| LOC644649 | 1.168 | 0.0214875 |
| MGC42157 | 1.168 | 0.0370017 |
| XLOC_010423 | 1.168 | 0.0376172 |
| LOC100506119 | 1.169 | 0.0174353 |
| PPP1R3F | 1.169 | 0.0354895 |
| DEFB105B | 1.169 | 0.0480017 |
| LOC100128077 | 1.17 | 0.0454389 |
| XLOC_l2_000920 | 1.17 | 0.0496402 |
| C20orf26 | 1.172 | 0.029415 |
| XLOC_004775 | 1.172 | 0.0372045 |
| CLTCL1 | 1.173 | 0.0149497 |
| KLHL35 | 1.173 | 0.0232433 |
| TBC1D29 | 1.173 | 0.0385671 |
| PPP6R2 | 1.173 | 0.0467956 |
| FFAR1 | 1.174 | 0.0261543 |
| IGLL1 | 1.174 | 0.0379545 |
| SMCR7 | 1.175 | 0.0033711 |
| B3GNT8 | 1.175 | 0.0119578 |
| XLOC_004679 | 1.175 | 0.0488512 |
| SPACA4 | 1.176 | 0.0331191 |
| DHRS2 | 1.176 | 0.0375889 |
| XLOC_005589 | 1.177 | 0.026684 |
| KREMEN1 | 1.177 | 0.0298059 |
| CASS4 | 1.177 | 0.0353789 |
| FAM129C | 1.177 | 0.0372211 |
| XLOC_l2_013427 | 1.178 | 0.0332098 |
| GGTLC1 | 1.178 | 0.0393901 |
| RPS6KL1 | 1.178 | 0.0441573 |
| SCARA5 | 1.179 | 0.0279147 |
| CPNE1 | 1.179 | 0.0314313 |
| SF3B2 | 1.179 | 0.0490226 |
| XLOC_010104 | 1.18 | 0.0185258 |
| PPP1R27 | 1.18 | 0.0357613 |
| CLSTN3 | 1.181 | 0.0063928 |
| CLCN6 | 1.181 | 0.0182885 |
| VSX1 | 1.181 | 0.033609 |
| XLOC_l2_000138 | 1.182 | 0.0164253 |
| RPS6KA1 | 1.182 | 0.0247926 |
| XLOC_l2_015673 | 1.182 | 0.0474818 |
| ABCC1 | 1.182 | 0.0497363 |
| TNNT2 | 1.183 | 0.0106871 |
| LOC100128703 | 1.183 | 0.0464843 |
| SCNN1D | 1.184 | 0.0081086 |
| C2orf71 | 1.184 | 0.01651 |
| LRFN4 | 1.185 | 0.0146705 |
| DNAH17 | 1.185 | 0.0359607 |
| XLOC_003710 | 1.185 | 0.0472773 |
| ARHGAP22 | 1.186 | 0.0086535 |
| PRAM1 | 1.186 | 0.0222004 |
| XLOC_004452 | 1.186 | 0.0260652 |
| LCE3E | 1.186 | 0.0435829 |
| TTC7A | 1.187 | 0.0236243 |
| PMPCA | 1.187 | 0.0255694 |
| XLOC_013785 | 1.187 | 0.0264955 |
| SP6 | 1.187 | 0.0481743 |
| COPS7B | 1.188 | 0.0078802 |
| XLOC_009191 | 1.188 | 0.0250502 |
| LOC100132966 | 1.188 | 0.0467861 |
| XLOC_004860 | 1.189 | 0.0185198 |
| LOC728158 | 1.19 | 0.0168159 |
| GGTLC1 | 1.19 | 0.0268595 |
| CASP9 | 1.19 | 0.0408727 |
| OTOG | 1.19 | 0.0456459 |
| GRIPAP1 | 1.191 | 0.0180892 |
| XLOC_012984 | 1.191 | 0.0217297 |
| PRDM13 | 1.191 | 0.0418408 |
| HEATR8 | 1.192 | 0.0089239 |
| ORAOV1 | 1.192 | 0.0136394 |
| PRAME | 1.192 | 0.0263041 |
| PILRA | 1.192 | 0.0412526 |
| ALPL | 1.194 | 0.0096233 |
| KCNJ13 | 1.194 | 0.0124946 |
| ARL8A | 1.194 | 0.01982 |
| XLOC_l2_004342 | 1.194 | 0.0285042 |
| KDM1B | 1.194 | 0.0309623 |
| LOC100131129 | 1.195 | 0.0179271 |
| CXorf49B | 1.197 | 0.0142788 |
| CCDC8 | 1.197 | 0.0242569 |
| LRIT1 | 1.198 | 0.0117791 |
| SNORA46 | 1.198 | 0.01438 |
| MARK4 | 1.198 | 0.0180843 |
| SLC35G5 | 1.198 | 0.0205956 |
| XLOC_l2_010228 | 1.198 | 0.0223075 |
| RTDR1 | 1.198 | 0.0479877 |
| PNPLA5 | 1.199 | 0.0448372 |
| IL24 | 1.2 | 0.0193274 |
| C19orf25 | 1.2 | 0.0200371 |
| SLAIN1 | 1.2 | 0.0282288 |
| SZT2 | 1.2 | 0.0496671 |
| IPO13 | 1.201 | 0.0022432 |
| TFE3 | 1.201 | 0.0246626 |
| DCDC1 | 1.201 | 0.0274652 |
| MAP3K10 | 1.201 | 0.0324267 |
| XLOC_008652 | 1.201 | 0.0364567 |
| CKAP2 | 1.201 | 0.0439209 |
| MYO15B | 1.202 | 0.0025881 |
| EFCAB5 | 1.202 | 0.0162959 |
| ZNF331 | 1.203 | 0.018998 |
| PRB3 | 1.203 | 0.0258043 |
| HRASLS | 1.203 | 0.0301464 |
| SLC9A4 | 1.204 | 0.0426091 |
| PRR13 | 1.204 | 0.0428603 |
| SHMT1 | 1.204 | 0.0469054 |
| OR6C4 | 1.204 | 0.0495091 |
| MS4A10 | 1.205 | 0.0129109 |
| OR52E4 | 1.205 | 0.0194219 |
| SIRPB2 | 1.206 | 0.0275826 |
| KCNC3 | 1.206 | 0.0333624 |
| BCL2L12 | 1.206 | 0.0429823 |
| KRT24 | 1.207 | 0.0211853 |
| CD70 | 1.208 | 0.0154777 |
| SNRPA | 1.208 | 0.0415122 |
| KIAA0509 | 1.208 | 0.0455936 |
| IGSF1 | 1.21 | 0.006701 |
| BEST4 | 1.211 | 0.016867 |
| OR2Z1 | 1.211 | 0.0196933 |
| RELB | 1.212 | 0.0124931 |
| C19orf73 | 1.212 | 0.0152586 |
| LOC729454 | 1.212 | 0.0158241 |
| XLOC_013429 | 1.212 | 0.0260317 |
| OR1I1 | 1.212 | 0.0370115 |
| GLTPD1 | 1.213 | 0.0339993 |
| ESPNL | 1.213 | 0.0450788 |
| NLGN4Y | 1.213 | 0.0450966 |
| CLEC4G | 1.214 | 0.0048244 |
| XLOC_003913 | 1.214 | 0.0100737 |
| PGS1 | 1.214 | 0.0141259 |
| XLOC_004480 | 1.214 | 0.0237441 |
| MAMSTR | 1.214 | 0.0311986 |
| HINFP | 1.215 | 0.0194279 |
| DKFZP547L112 | 1.216 | 0.0077337 |
| MMP19 | 1.216 | 0.0243182 |
| ASPHD1 | 1.217 | 0.0119287 |
| C2orf82 | 1.218 | 0.0145803 |
| XLOC_014257 | 1.218 | 0.0453625 |
| XLOC_009814 | 1.219 | 0.0060615 |
| C16orf82 | 1.219 | 0.0291609 |
| TERT | 1.221 | 0.0058915 |
| HTR3A | 1.221 | 0.0367985 |
| XLOC_003588 | 1.222 | 0.0124098 |
| ARHGEF10 | 1.222 | 0.0136744 |
| LOC642648 | 1.222 | 0.0483774 |
| XLOC_000677 | 1.223 | 0.0152848 |
| LOC100131170 | 1.223 | 0.0188036 |
| LOC100126584 | 1.223 | 0.0188278 |
| MMACHC | 1.223 | 0.0198229 |
| ADARB2 | 1.223 | 0.0374722 |
| CHKA | 1.224 | 0.0190713 |
| CDHR3 | 1.224 | 0.0309126 |
| LOC646498 | 1.225 | 0.0050332 |
| XLOC_005808 | 1.227 | 0.0183702 |
| C15orf55 | 1.23 | 0.0131243 |
| NCR1 | 1.23 | 0.0178536 |
| GAGE7 | 1.23 | 0.0313771 |
| LOC100130741 | 1.23 | 0.0455443 |
| GDNF | 1.231 | 0.0061328 |
| LOC100134285 | 1.231 | 0.0183288 |
| XAGE2B | 1.231 | 0.0337008 |
| TLL2 | 1.232 | 0.015757 |
| OR4A15 | 1.233 | 0.0406083 |
| KRTAP5-5 | 1.234 | 0.0026058 |
| PTCH1 | 1.234 | 0.0359049 |
| XLOC_002352 | 1.235 | 0.0394801 |
| OR2T27 | 1.236 | 0.0236594 |
| LOC100653051 | 1.238 | 0.0164278 |
| DYTN | 1.238 | 0.0242769 |
| HOMER1 | 1.238 | 0.0333602 |
| C8orf60 | 1.238 | 0.0484621 |
| XLOC_002473 | 1.239 | 0.0293734 |
| HERC2P7 | 1.239 | 0.0308253 |
| SLC19A3 | 1.239 | 0.043392 |
| FGF21 | 1.24 | 0.0416383 |
| ASCL2 | 1.241 | 0.0263553 |
| KCNA6 | 1.243 | 0.0120933 |
| TRH | 1.245 | 0.0175456 |
| ANO7 | 1.245 | 0.0211384 |
| PSMB11 | 1.245 | 0.0240275 |
| XLOC_l2_009441 | 1.246 | 0.0192705 |
| CDC42BPB | 1.246 | 0.0267702 |
| LOC100128703 | 1.246 | 0.0371727 |
| C20orf112 | 1.246 | 0.0409019 |
| ACOT11 | 1.247 | 0.033132 |
| XLOC_001354 | 1.248 | 0.0137924 |
| ZDHHC8 | 1.248 | 0.0206458 |
| XLOC_006577 | 1.248 | 0.0377349 |
| ERVFRD-2 | 1.248 | 0.0399516 |
| FRG2C | 1.249 | 0.0246397 |
| LOC100128607 | 1.249 | 0.0444143 |
| PYCR2 | 1.25 | 0.0180432 |
| GPT | 1.251 | 0.0048534 |
| EPHA10 | 1.251 | 0.0109878 |
| XLOC_010648 | 1.251 | 0.0447052 |
| OVOS2 | 1.252 | 0.0039907 |
| MEFV | 1.253 | 0.0262143 |
| PPIAL4G | 1.253 | 0.0414499 |
| Q442D3 | 1.254 | 0.0104414 |
| PRAMEF15 | 1.254 | 0.0182726 |
| XLOC_002275 | 1.254 | 0.0271111 |
| XLOC_003630 | 1.254 | 0.0301146 |
| XLOC_002612 | 1.255 | 0.0445962 |
| LOC100507146 | 1.256 | 0.004399 |
| SEC14L3 | 1.257 | 0.0135325 |
| MX2 | 1.259 | 0.0295996 |
| GPR78 | 1.26 | 0.0136957 |
| IL17REL | 1.26 | 0.0276303 |
| MAPKAPK3 | 1.26 | 0.0430008 |
| RFPL4A | 1.26 | 0.0452056 |
| CDX2 | 1.26 | 0.047151 |
| NUDT16L1 | 1.261 | 0.0036027 |
| OR4C12 | 1.261 | 0.0075945 |
| GZMH | 1.262 | 0.0015889 |
| RASA4 | 1.264 | 0.0292383 |
| SV2B | 1.264 | 0.031612 |
| NPS | 1.265 | 0.0089241 |
| XLOC_011940 | 1.266 | 0.0219971 |
| FAM188B | 1.267 | 0.0116395 |
| SFXN2 | 1.267 | 0.0450875 |
| XLOC_005285 | 1.269 | 0.016023 |
| SIRPD | 1.27 | 0.0176821 |
| XLOC_002613 | 1.271 | 0.0240926 |
| CECR2 | 1.273 | 0.0336149 |
| XLOC_l2_014423 | 1.273 | 0.0459252 |
| LOC100507213 | 1.274 | 0.0270476 |
| EREG | 1.274 | 0.0402868 |
| LOC284263 | 1.274 | 0.0412255 |
| XLOC_004651 | 1.275 | 0.0492144 |
| CD300LD | 1.277 | 0.0228481 |
| XAGE1A | 1.277 | 0.0374116 |
| BDH1 | 1.277 | 0.0468356 |
| RNASET2 | 1.279 | 0.0423854 |
| LOC100287482 | 1.28 | 0.0487293 |
| ZNF331 | 1.283 | 0.002404 |
| SPRED3 | 1.284 | 0.0119598 |
| KDM1B | 1.285 | 0.0043615 |
| LOC100130458 | 1.286 | 0.0145261 |
| KRBA2 | 1.286 | 0.0187685 |
| FAM110B | 1.286 | 0.0292661 |
| PTCRA | 1.287 | 0.0110132 |
| GCLM | 1.29 | 0.0222172 |
| NXF3 | 1.29 | 0.0418759 |
| CRYAA | 1.291 | 0.0109826 |
| XLOC_l2_004121 | 1.292 | 0.0137687 |
| DEFB115 | 1.292 | 0.0140248 |
| KIR3DL1 | 1.293 | 0.0132341 |
| RNF151 | 1.295 | 0.003554 |
| ARHGAP40 | 1.295 | 0.0364762 |
| GMDS | 1.295 | 0.0392089 |
| ZCCHC11 | 1.296 | 0.0152506 |
| NCF4 | 1.296 | 0.044311 |
| PYCR2 | 1.297 | 0.0090486 |
| XLOC_007885 | 1.298 | 0.010426 |
| SEC14L4 | 1.298 | 0.0301351 |
| ATF3 | 1.299 | 0.0415704 |
| XLOC_l2_010020 | 1.301 | 0.0341465 |
| KIF19 | 1.303 | 0.0322943 |
| SVOPL | 1.304 | 0.0172027 |
| TBX10 | 1.305 | 0.0014915 |
| PLA2G3 | 1.305 | 0.0125156 |
| XLOC_009608 | 1.309 | 0.0037199 |
| XLOC_006035 | 1.309 | 0.0142095 |
| CIITA | 1.31 | 0.0454708 |
| XLOC_l2_003897 | 1.31 | 0.0489722 |
| TP73 | 1.313 | 0.0018119 |
| YY2 | 1.313 | 0.0147426 |
| FASTK | 1.314 | 0.0141395 |
| KIR2DL2 | 1.316 | 0.0484986 |
| LOC780529 | 1.317 | 0.0224864 |
| LOC100130857 | 1.32 | 0.0022185 |
| LOC729879 | 1.321 | 0.0428136 |
| DENR | 1.327 | 0.0390282 |
| NCEH1 | 1.33 | 0.0366189 |
| PRSS38 | 1.333 | 0.0081125 |
| HOXD9 | 1.334 | 0.0161993 |
| DRGX | 1.336 | 0.0227615 |
| OPRD1 | 1.34 | 0.0152551 |
| PRAMEF5 | 1.342 | 0.0493872 |
| SLC26A5 | 1.343 | 0.0412652 |
| TMPRSS15 | 1.344 | 0.0346528 |
| CACNA1G | 1.346 | 0.019531 |
| DOK2 | 1.346 | 0.0461239 |
| LGALS9 | 1.35 | 0.0452414 |
| LRRIQ3 | 1.352 | 0.0347578 |
| KIR2DS2 | 1.355 | 0.0277971 |
| XLOC_005747 | 1.357 | 0.0218561 |
| XLOC_003907 | 1.358 | 0.0091716 |
| IL18 | 1.358 | 0.048624 |
| TULP2 | 1.359 | 0.0031272 |
| HOTAIR | 1.359 | 0.030208 |
| SYPL2 | 1.361 | 0.0107956 |
| LOC100128830 | 1.361 | 0.0180045 |
| FABP6 | 1.363 | 0.0344865 |
| LOC388210 | 1.367 | 0.0253502 |
| SPZ1 | 1.368 | 0.0008831 |
| MGAT4C | 1.368 | 0.0095652 |
| KIR2DL4 | 1.368 | 0.0150903 |
| SPDEF | 1.373 | 0.0276296 |
| FXYD3 | 1.378 | 0.0287534 |
| OR1J1 | 1.38 | 0.0155441 |
| HIST1H4G | 1.381 | 0.046203 |
| ARHGAP26 | 1.394 | 0.0215874 |
| CDK18 | 1.395 | 0.0326716 |
| TAS2R7 | 1.4 | 0.0102726 |
| PCDH1 | 1.412 | 0.0448827 |
| TNFRSF1B | 1.414 | 0.0214687 |
| LOC283501 | 1.415 | 0.0451118 |
| XLOC_l2_009572 | 1.419 | 0.0069327 |
| CASZ1 | 1.433 | 0.0226081 |
| AGMAT | 1.436 | 0.042316 |
| SAT1 | 1.439 | 0.030504 |
| LOC100653147 | 1.442 | 0.0211643 |
| SH3D21 | 1.454 | 0.0172136 |
| MSR1 | 1.464 | 0.0468642 |
| LOC643401 | 1.487 | 0.0448074 |
| XLOC_004323 | 1.499 | 0.0217942 |
| DUSP27 | 1.503 | 0.0407828 |
| XLOC_006756 | 1.519 | 0.0056558 |
| MMP8 | 1.547 | 0.0487908 |
| XLOC_004323 | 1.555 | 0.0460251 |
| SIRPB1 | 1.561 | 0.0258612 |
| LHX2 | 1.566 | 0.0129291 |
| FCAR | 1.575 | 0.0413877 |
| TNFRSF1B | 1.585 | 0.0220808 |
| RGS1 | 1.594 | 0.0449469 |
| MS4A5 | 1.632 | 0.0127779 |
| XLOC_004323 | 1.641 | 0.0119206 |
| FAM71E2 | 1.647 | 0.0039326 |
| XLOC_013856 | 1.653 | 0.0001824 |
| 10-Mar | 1.66 | 0.0126247 |
| GK | 1.674 | 0.006251 |
| TMEM150B | 1.701 | 0.0489236 |
| ADH6 | 1.78 | 0.0303923 |
| SPIB | 1.834 | 0.0449792 |
| KIAA1199 | 2.034 | 0.0349782 |
| KIAA1199 | 2.051 | 0.0426358 |
| ADH6 | 2.189 | 0.0232634 |
| SLC26A9 | 2.338 | 0.0063199 |
